# Supplementary material for: Electron tomography of mouse LINC complexes at meiotic telomere attachment sites with and without microtubules
Source: PubMed Central journal article supplement (PMC6791847; doi:10.1038/s42003-019-0621-1), 2019-10-14
Supplement: 42003_2019_621_MOESM1_ESM.pdf [file 42003_2019_621_MOESM1_ESM.pdf]

## Supporting figures

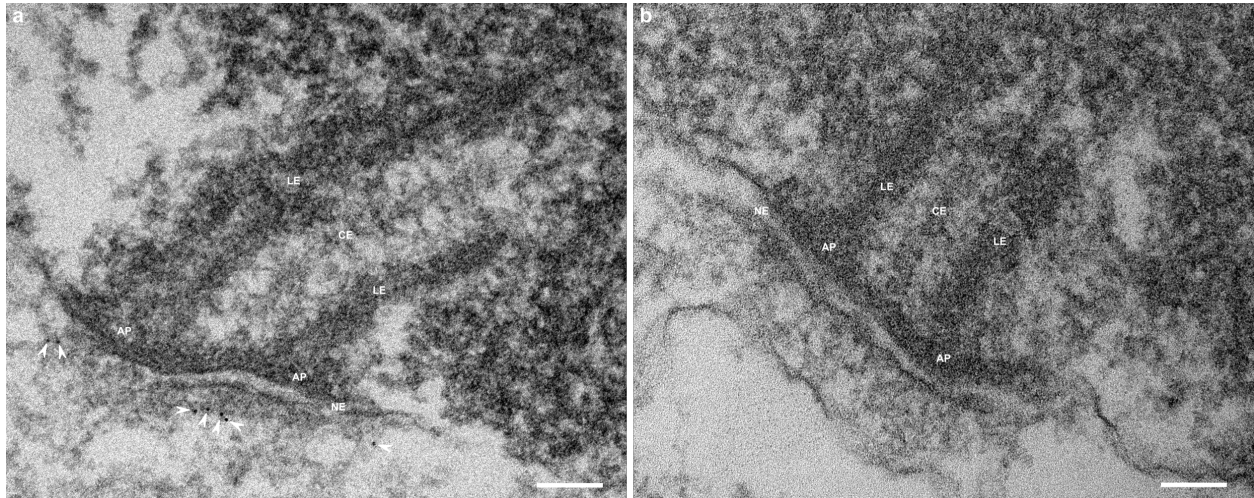

**Supplementary Figure 1. Immunogold localization of KASH5 N-terminus.** (A) Localization of KASH5 N-terminus on frozen sections using 6 nm colloidal gold for visualization. (B) Negative control of KASH5 N-terminus localization. Frozen sections were incubated with only the secondary antibody conjugated to 6 nm colloidal gold, without primary antibody against the KASH5 N-terminus. Note the absence of gold at the attachment site in B. Arrowheads: colloidal gold; AP: attachment plate; NE: nuclear envelope; LE: lateral element; CE: central element; Ch: chromatin. Scale bars: 100 nm.

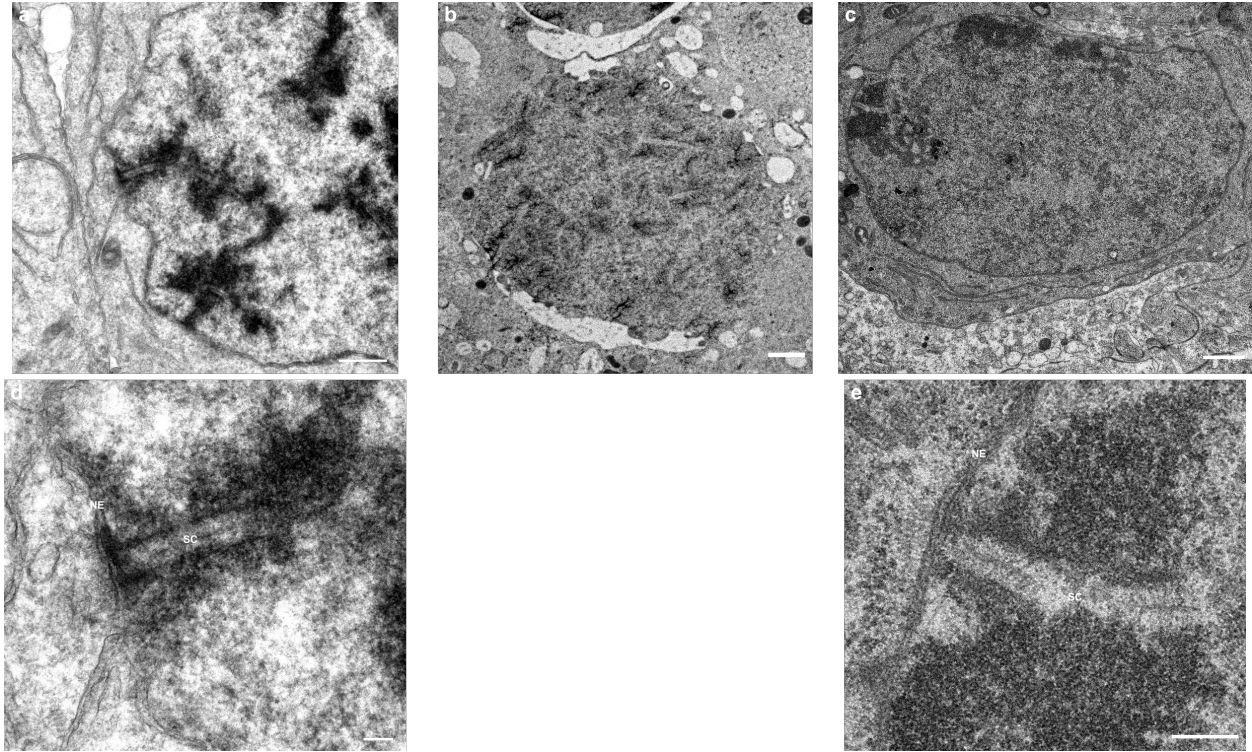

**Supplementary Figure 2. Ultrastructural preservation in pachytene spermatocytes.** Structural preservation after chemical fixation (A,D), high-pressure freezing followed by freeze substitution (B) and pre-fixation with subsequent high-pressure freezing and freeze substitution (C,E). A and C show an overview of the pachytene spermatocytes, D and E the respective telomere attachment site. A,D: Nuclear envelope is affected by shrinking artifacts characterized by a variation in perinuclear space. B: Nuclear content detached from nuclear envelope due to shearing forces during preparation and high-pressure freezing. C,E: Continuous even spacing of the two nuclear envelopes and overall less extracted sample indicative of a better (ultra)structural preservation. SC: synaptonemal complex; NE: nuclear envelope. Scale bars: 1  $\mu\text{m}$  (A-C); 200 nm (D-E).

## Supporting tables

| initial temperature | final temperature | duration   | solution                                                         | comment                                   |
|---------------------|-------------------|------------|------------------------------------------------------------------|-------------------------------------------|
| -90 °C              |                   | 96 h       | 0.5 % glutaraldehyde + 0.1 % tannic acid<br>in anhydrous acetone | exchange solution once                    |
| -90 °C              |                   | 4-6 h      | anhydrous acetone                                                | 4 consecutive wash steps                  |
| -90 °C              |                   | 28 h       | 2% OsO4 in anhydrous acetone                                     |                                           |
| -90 °C              | -20 °C            | 14 h       |                                                                  |                                           |
| -20 °C              |                   | 16 h       |                                                                  |                                           |
| -20 °C              | 4 °C              | 4 h        |                                                                  |                                           |
| 4 °C                |                   | 2-3 h      | anhydrous acetone                                                | 4 consecutive wash steps                  |
| 4°C                 | RT                |            |                                                                  | remove sample pellet from carrier         |
| RT                  |                   | 5 h        | 50 % epoxy resin in acetone                                      |                                           |
| 4 °C                |                   | over night | 90 % epoxy resin in acetone                                      |                                           |
| RT                  |                   | 2-3 h      | 100 % epoxy resin                                                |                                           |
| RT                  |                   | 2-3 h      | 100 % epoxy resin                                                |                                           |
| RT                  |                   | 2-3 h      | 100 % epoxy resin                                                |                                           |
| RT                  |                   |            | 100 % epoxy resin                                                | polymerisation for at least 48 h at 60 °C |

**Supplementary Table 1.** Freeze substitution protocol
